# Supplementary material for: Genome-wide Association Study and Possible Candidate Genes for Root Color and Carotenoid Contents in Japanese Orange Carrot F2 Populations
Source: Research Square preprint supplement (doi:10.21203/rs.3.rs-1014140/v1), 2021-11-10
Supplement: Supplementary file 1 [file bf3594de8c372eedda576a4d.xlsx]

## Sheet: Supp Table1
	Supplemental Table S1. Primers used in Sangar sequencing.
	Primer name	forward primer	reverse primer
	For Or
	Or_1	CATCTGCACAAACCCATGTC	CTTAAGCCGCAAAACCTGAG
	Or_2	TTGTGGGACTTGTGTCTGCT	AGAACAATCCTCGCAACCAT
	Or_3	CAAGGCTACTCGGGAAGCTA	CATGGGTCATCATTGTGCAT
	Or_4	TCCCTTCCTCTCTCGTATGG	AGAAGACCCCCAAAGACGAT
	Or_5	TGGTTCGTTTCTGTTTTTCG	CGGACGCTAATAAGCCAAGT
	Or_6	TTGTGATCCATCGACAAAGTG	AAGCTGCCATCAGAAGTGGT
	Or_7	GGTTTGGATTCCAGAAATGCT	CAATGGCCGGTGCTATATCT
	Or_8	TATAGTGGGATCCTTGGCGTA	TTCAAGGAAGGGCATGTAGG
	Or_9	TGGACCCCATAGTAGCGTCT	TGTCCCGGAAAACAAGTAGG
	Or_10	GCTGCCATCGTGTATGGTTT	TGTGTGTCTATCCGGTGGAA
	For CYC-B
	LCY_1	GTTGCCCGGTTACAAACATC	GCGAGGCTCAGACATTTAGG
	LCY_2	CGATCCAAGACACTCAGCAA	TGGCCCATGTCATCTGTTTA
	LCY_3	CACAATCAAACTCGCCTTGA	TGAGTCTTTCTGGGCAATCA
	LCY_4	AATTCCATAGCCAGCCACAC	TGCAGATGGCAGAGAGTATCA

## Sheet: Supp Table2
Supplementary table 2. GWAS results for β/α-carotene ratio in F2 population A.
Significant -log10P values based on Bonferroni correction (0.05) were highlighted.
SNP	chromosome	physical position (bp)*	-log10P
1	1	32170	0.911403
2	1	32472	1.02914
3	1	160739	1.25696
4	1	235695	0.898219
5	1	249584	0.43181
6	1	249601	0.74936
7	1	249608	0.43181
8	1	249870	0.43181
9	1	249888	0.43181
10	1	539842	0.898081
11	1	646279	0.97572
12	1	694481	1.14255
13	1	694484	1.14442
14	1	694488	1.22026
15	1	694490	1.22026
16	1	694511	1.14442
17	1	694891	1.14442
18	1	719587	0.938321
19	1	719588	0.707633
20	1	1619685	0.458121
21	1	1968678	0.635374
22	1	1968681	0.655844
23	1	2095999	0.329541
24	1	3614117	0.459045
25	1	3614171	0.426664
26	1	3614184	0.352509
27	1	3614365	0.459045
28	1	3614390	0.500052
29	1	3652405	0.40878
30	1	4311868	0.991868
31	1	4424764	0.342361
32	1	4692061	0.587909
33	1	4981787	0.125026
34	1	5162352	0.106771
35	1	5162353	0.11685
36	1	5162374	0.14813
37	1	5162389	0.14813
38	1	5162396	0.14813
39	1	5162416	0.14813
40	1	5162441	0.125541
41	1	6951193	0.24501
42	1	6951478	0.225242
43	1	6951500	0.323142
44	1	7349252	0.0918529
45	1	11137932	0.0713942
46	1	12574417	7.33724
47	1	12574431	7.47886
48	1	12574447	8.77989
49	1	13659098	0.115273
50	1	14706180	0.18504
51	1	14753914	0.175588
52	1	14757628	0.294316
53	1	15596659	0.025051
54	1	15807974	0.0593839
55	1	15808351	0.0452511
56	1	15808354	0.0452511
57	1	15808361	0.0452511
58	1	15808368	0.0807859
59	1	15808381	0.0452511
60	1	15809770	0.0252121
61	1	15832013	0.114588
62	1	16634795	0.128118
63	1	16634858	0.128118
64	1	19610859	0.141337
65	1	19611226	0.118969
66	1	21517028	0.243767
67	1	21759170	0.316134
68	1	21761512	0.293854
69	1	21761821	0.259716
70	1	21761828	0.318225
71	1	21794150	0.323654
72	1	21843479	0.349071
73	1	21843485	0.349071
74	1	21843527	0.315146
75	1	22102817	0.239623
76	1	22102839	0.348073
77	1	22103229	0.241929
78	1	22103259	0.146265
79	1	22103262	0.217219
80	1	22103277	0.241929
81	1	22103290	0.202982
82	1	22249526	0.342791
83	1	22249845	0.279023
84	1	22249870	0.279023
85	1	22313033	0.228155
86	1	22313044	0.197165
87	1	22313045	0.228155
88	1	22313092	0.228155
89	1	22313290	0.295704
90	1	22313317	0.351035
91	1	22313323	0.348441
92	1	22313332	0.348441
93	1	22464757	0.163303
94	1	22464766	0.135009
95	1	22464793	0.163303
96	1	22465013	0.135009
97	1	22555875	0.2918
98	1	22555919	0.455671
99	1	22758022	0.454458
100	1	22802779	0.273746
101	1	22813352	0.479006
102	1	22813547	0.479006
103	1	22838682	0.46198
104	1	22838732	0.46198
105	1	25414949	0.361132
106	1	25525347	0.291911
107	1	25525746	0.37977
108	1	26188779	0.584076
109	1	26189187	0.500863
110	1	27349124	0.0583246
111	1	27608973	0.175718
112	1	27609206	0.175718
113	1	28394282	0.184641
114	1	28394283	0.184641
115	1	28394284	0.184641
116	1	28394299	0.184641
117	1	28443463	0.126313
118	1	28576770	0.0154412
119	1	28577026	0.02354
120	1	28941985	0.0225736
121	1	28942413	0.0225736
122	1	29876240	0.00954127
123	1	29979619	0.00901773
124	1	29995346	0.0118515
125	1	30090002	0.189606
126	1	30191073	0.010101
128	1	30350194	0.0314984
129	1	30350198	0.231725
130	1	30350204	0.136635
131	1	30350217	0.136635
132	1	30350257	0.136635
133	1	30350263	0.136635
134	1	30350274	0.0621763
135	1	30682362	0.0386549
136	1	30682421	0.0411925
137	1	30682657	0.0411925
138	1	30704558	0.023352
139	1	30722635	0.0177061
140	1	30722638	0.0204425
141	1	30722646	0.0201331
142	1	30722672	0.0201331
143	1	30722682	0.0414887
144	1	30722692	0.0177061
145	1	30722700	0.0201331
146	1	30782032	0.163999
147	1	30886246	0.369501
148	1	30886262	0.00229915
149	1	30886492	0.0305654
150	1	30900603	0.0167617
151	1	30900612	0.0167617
152	1	30918688	0.124638
153	1	30918703	0.066285
154	1	30918722	0.122358
155	1	30918743	0.0296159
156	1	30918757	0.0471785
157	1	30919040	0.239811
158	1	30919052	0.378139
159	1	30919061	0.455771
160	1	30919107	0.565415
161	1	31063661	0.0203287
162	1	31063672	0.0203287
163	1	31063699	0.0203287
164	1	31063700	0.0203287
165	1	31112071	0.0366798
166	1	31112458	0.236789
167	1	31112534	0.13521
168	1	31233616	0.028534
169	1	31233641	0.00350146
170	1	31275614	0.303425
171	1	31275646	0.350743
172	1	31275647	0.482448
173	1	31467837	0.253311
174	1	31467949	0.0179777
175	1	31468256	0.0432219
176	1	31468282	0.0179777
177	1	31628773	0.239751
178	1	31628809	0.168373
179	1	31630445	0.113199
180	1	31630475	0.113199
181	1	32272647	0.344074
182	1	32472343	0.394415
183	1	32472346	0.39157
184	1	32472366	0.380458
185	1	32587557	0.370305
186	1	32620084	0.226119
187	1	32679462	0.253234
188	1	32679940	0.253234
189	1	32679966	0.276717
190	1	32683770	0.108167
191	1	32693618	0.240279
192	1	32694039	0.24287
193	1	32694048	0.240158
194	1	32694065	0.240279
195	1	32694094	0.0541869
196	1	32717359	0.254363
197	1	32717366	0.254363
198	1	34623876	0.27989
199	1	35243553	0.211075
200	1	35243610	0.144451
201	1	35296336	0.263651
202	1	35296370	0.487849
203	1	35296692	0.617371
204	1	35314163	0.108424
205	1	36631506	0.124458
206	1	36709414	0.260855
207	1	36892423	0.18217
208	1	37044963	0.20048
209	1	37185123	0.272296
210	1	37192064	0.993748
211	1	37192094	0.317088
212	1	37192142	0.343107
213	1	37192511	0.328809
214	1	37192542	0.675039
215	1	37192562	0.609842
216	1	37192574	0.328809
217	1	37192580	0.357743
218	1	37260846	0.635768
219	1	37570785	0.395688
220	1	37570847	0.395688
221	1	37609295	0.213781
222	1	37609322	0.366027
223	1	37609360	0.286157
224	1	37640504	0.00329136
225	1	37640852	0.033755
233	1	39848143	0.271768
234	1	39848458	0.245254
235	1	40429435	0.14245
236	1	40602260	0.119244
237	1	40602494	0.156593
238	1	40809248	0.155448
239	1	40809296	0.155448
240	1	40809308	0.155448
241	1	40816070	0.104224
242	1	40816455	0.148919
243	1	40869607	0.1819
244	1	40869623	0.110625
245	1	40869678	0.171443
246	1	40869682	0.15252
247	1	40967368	0.265072
248	1	40967428	0.292873
249	1	40967597	0.255511
250	1	40967602	0.242498
251	1	40967607	0.268629
252	1	40967608	0.235368
253	1	41172364	0.0505612
254	1	41298534	0.0914024
255	1	41298557	0.155361
256	1	41298572	0.155361
257	1	41298591	0.0723987
258	1	41298592	0.201999
259	1	41298607	0.0914024
260	1	41319995	0.210144
261	1	41320003	0.112467
262	1	41320024	0.177453
263	1	41320037	0.082505
264	1	41630419	0.0150633
265	1	41743115	0.159273
266	1	41892765	0.486489
267	1	41892977	0.405696
268	1	41935319	0.0257601
269	1	41935323	0.0257601
270	1	41935325	0.0257601
271	1	42282818	1.02068
272	1	42282850	1.11092
273	1	42282851	1.21162
274	1	42282852	1.0532
275	1	42282975	1.09561
276	1	42282979	1.0382
277	1	42282994	0.929888
278	1	42283005	1.0532
279	1	43816098	0.107138
280	1	43908261	2.67366
282	1	44042023	0.923178
283	1	44042458	0.0645935
284	1	44042462	0.109182
285	1	44042470	0.73679
286	1	44482111	0.243744
287	1	44696396	0.232963
288	1	44810629	0.328614
289	1	44810958	0.328614
290	1	44810959	0.324258
291	1	44847074	0.513201
292	1	44847112	0.76797
293	1	44847137	0.458396
294	1	44847497	0.312542
295	1	47118131	0.287232
296	1	47118135	0.26661
297	1	47118176	0.159235
298	1	47118481	0.137976
299	1	47118482	0.16516
300	1	47932345	0.710523
301	1	47932372	0.710523
302	1	48018483	0.330944
303	1	48018503	0.304413
304	1	48018526	0.304413
305	1	48018544	0.304413
306	1	48018878	0.305983
307	1	48258717	0.0737553
308	1	48258750	0.0861703
309	1	48859391	0.129865
310	1	48859397	0.158885
311	1	48859405	0.129865
312	1	48859442	0.129865
313	1	48859460	0.129865
314	1	48859477	0.129865
315	1	49164689	0.184183
316	1	49165334	0.175321
317	1	49383122	0.0224593
318	1	49567003	0.18358
319	1	49567381	0.0769426
320	1	49567413	0.0769426
321	1	49617948	0.153508
322	1	49726290	0.114475
323	1	49961682	0.137773
324	1	50203736	0.0839463
325	1	50203960	0.0498153
326	1	50218331	0.0919924
327	1	50218346	0.12945
328	1	50218766	0.0919924
329	1	50241447	0.475747
330	1	50241467	0.299928
331	1	50466644	0.094312
332	1	50466677	0.094312
333	1	50466935	0.113803
334	1	50466965	0.0896691
335	1	50466968	0.0961832
336	1	50562336	0.0267613
337	1	50676890	0.0212673
338	1	50676935	0.0849327
339	1	50866201	0.121904
340	1	50866621	0.146223
341	1	50866648	0.104953
342	1	50866682	0.107672
343	1	50961660	0.343384
344	1	50961662	0.0928091
345	1	51026281	0.0115793
346	1	51136649	0.120835
347	1	51142503	0.125141
348	1	51142831	0.125141
349	1	51239248	0.0438988
350	1	51239263	0.0507808
351	1	51239647	0.0524291
352	1	51239648	0.0572084
353	1	51239652	0.0524291
354	2	299219	0.081718
355	2	302421	0.185034
356	2	317735	0.205449
357	2	690912	0.104268
358	2	1265745	0.147099
359	2	1265769	0.147099
360	2	1265792	0.0886027
361	2	1265810	0.113148
362	2	1265813	0.0181633
363	2	1265816	0.0196966
364	2	1265818	0.152649
365	2	2392567	0.0493772
366	2	2392849	0.0607254
367	2	2429869	0.665868
368	2	2814633	0.249615
369	2	2814643	0.488598
370	2	2814680	0.249615
371	2	2814997	0.249615
372	2	2815019	0.249615
373	2	3670843	0.181358
374	2	3671176	0.421854
375	2	3671188	0.437731
376	2	8887435	0.834578
377	2	8887444	0.972977
378	2	8887466	0.972977
379	2	8887846	0.834578
380	2	8887863	1.04412
381	2	9545062	0.519763
382	2	9545083	0.65547
383	2	9545110	0.65547
384	2	9545139	0.660708
385	2	9636609	0.439125
386	2	9636675	0.713521
387	2	10281204	0.27311
388	2	10441784	0.822723
389	2	10441794	0.822723
390	2	10441799	0.822723
391	2	10441843	0.828303
392	2	12221976	0.668714
393	2	12290147	0.455634
394	2	12290171	0.414167
395	2	12290174	0.455634
396	2	12832897	1.12645
397	2	12832930	1.1209
398	2	12832931	1.1286
399	2	12832948	1.146
400	2	13622017	0.719558
401	2	13622051	1.20273
402	2	13622440	1.1181
403	2	13622460	1.15802
404	2	13622464	1.25602
405	2	13622467	1.73684
406	2	13622479	1.60085
407	2	13622486	1.0815
408	2	13625626	0.905808
409	2	13625638	0.652241
410	2	14697562	1.50169
411	2	14697566	2.00966
412	2	14697592	1.70708
413	2	14826971	1.0986
414	2	15062901	1.2426
415	2	15063266	1.19017
416	2	15266614	1.1477
417	2	15266639	1.26011
418	2	15266671	1.26011
419	2	15266674	1.19928
420	2	15267136	1.30051
421	2	15456878	0.228376
422	2	16264003	1.85263
423	2	16264333	2.01457
424	2	16264340	1.93779
425	2	16264350	1.87746
426	2	16264387	1.87746
427	2	16264411	1.90101
428	2	16769352	4.56067
429	2	16769366	3.57675
430	2	16984856	1.64878
431	2	16985106	1.64493
432	2	16985165	1.64493
433	2	16985169	1.71153
434	2	17049218	2.49757
435	2	17049221	2.49757
436	2	17049230	2.49757
437	2	17049260	2.49757
438	2	17049545	2.30715
439	2	17334568	1.95156
440	2	17334572	1.99396
441	2	17334611	1.97964
442	2	17363368	1.81417
443	2	17363371	2.00087
444	2	17363378	1.81417
445	2	17363441	2.00087
446	2	17363451	1.98928
447	2	17598628	1.59091
448	2	17599072	1.61137
449	2	17974613	2.23359
450	2	18173142	2.52724
451	2	18388148	2.35853
452	2	19226304	2.28483
453	2	19351227	2.02595
454	2	19351271	2.02595
455	2	20385946	2.91009
456	2	20385957	2.87943
457	2	20385961	2.91009
458	2	20385984	2.87943
459	2	20641870	3.05159
460	2	20668079	2.26043
461	2	20668086	2.31158
462	2	20668107	2.26043
463	2	20668128	2.26043
464	2	20668130	2.26043
465	2	20860561	3.39469
466	2	20860588	3.39469
467	2	20860642	3.44491
468	2	21025413	3.56864
469	2	21025428	3.51004
470	2	21025431	3.48812
471	2	21025773	3.51004
472	2	21025789	3.51004
473	2	21025813	3.66354
474	2	21147442	2.20761
475	2	21147906	2.86646
476	2	21778990	1.81702
477	2	21779043	2.46092
478	2	21779202	1.95782
479	2	21779281	2.74958
480	2	22019919	3.6925
481	2	22570947	3.24033
482	2	22920393	0.977778
483	2	22920422	0.719968
484	2	22920643	1.63582
485	2	22980373	3.34486
486	2	22980378	3.34486
487	2	23156428	0.0728145
488	2	23208796	3.09259
489	2	23208886	3.4034
490	2	23532880	2.84771
491	2	23588118	3.13253
492	2	23588119	3.25104
493	2	23588552	2.71444
494	2	23630837	3.15428
495	2	23651117	3.35262
496	2	23654938	2.30016
497	2	23655418	2.28567
498	2	23655429	2.29585
499	2	23655536	3.3363
500	2	23655573	3.42946
501	2	23656011	3.3363
502	2	23656025	3.52143
503	2	23691958	3.10073
504	2	23692032	3.39686
505	2	23692191	3.10073
506	2	23692212	3.14146
507	2	24251597	2.72354
508	2	24251909	2.94692
509	2	24251920	2.2204
510	2	24471404	3.01368
511	2	24508673	3.51428
512	2	24508676	3.42251
513	2	24508697	3.39362
514	2	24508702	3.74715
515	2	24508704	3.39362
516	2	24508718	3.51428
517	2	24509057	3.51428
518	2	25064886	2.90309
519	2	25065264	2.90658
520	2	25212942	2.63078
521	2	25213335	2.79588
522	2	25213391	2.93554
523	2	25213401	2.75203
524	2	25470542	3.99568
525	2	25470605	3.99568
526	2	25470608	3.84466
527	2	25515112	2.82974
528	2	25515113	2.82974
529	2	25515417	3.42597
530	2	25515420	2.82974
531	2	25515424	2.82974
532	2	25685217	3.88273
533	2	25685292	3.5867
534	2	25685296	3.88273
535	2	25743124	2.9393
536	2	25743572	2.91009
537	2	25743640	2.9393
538	2	25763435	3.63264
539	2	25977825	3.21467
540	2	26726136	2.62342
541	2	27730445	4.22185
542	2	27795359	4.12263
543	2	27795399	4.12263
544	2	27795401	4.12263
545	2	27802341	3.33819
546	2	27804184	3.31247
547	2	27816550	3.56543
548	2	27816589	3.56543
549	2	27985783	3.17393
550	2	30026696	0.74756
551	2	30026717	0.731188
552	2	30026921	0.73679
553	2	30026929	0.729997
554	2	30031347	3.50446
555	2	30031598	4.06651
556	2	30031602	4.09528
557	2	30031605	3.45469
558	2	30031641	3.45469
559	2	30031674	3.71444
560	2	30089664	3.56703
561	2	30098643	2.81531
562	2	30098645	2.95861
563	2	30098657	3.5817
564	2	30098676	2.81531
565	2	30098698	2.81531
566	2	30098699	2.81531
567	2	30098713	3.68825
568	2	30176100	3.11182
569	2	30523814	4.02136
570	2	30523826	3.95861
571	2	30523835	3.96257
572	2	30523838	4.02136
573	2	30763237	4.06198
574	2	30763510	3.97881
575	2	30763568	3.96257
576	2	30939136	4.31876
577	2	30939157	4.31876
578	2	31099509	4.3279
579	2	31099513	4.3279
580	2	31099836	4.3279
581	2	31120499	3.9914
582	2	31132238	4.19654
583	2	31132244	4.13253
584	2	31132259	4.19654
585	2	31132546	4.19654
586	2	31132565	4.19654
587	2	31132623	4.19654
588	2	32199022	3.92445
589	2	32199071	3.84771
590	2	32199317	3.63639
591	2	32403682	3.71897
592	2	33111561	4.22915
593	2	33111627	4.28316
594	2	33112008	4.32698
595	2	33112021	4.34679
596	2	33202637	3.97062
597	2	33202657	3.97062
598	2	33217006	4.45346
599	2	33230490	4.33068
600	2	33230544	4.32883
601	2	33230549	4.32883
602	2	33560488	2.57025
603	2	33560909	2.92082
604	2	33593480	4.42713
605	2	33593481	4.42713
606	2	33593483	4.42713
607	2	33593500	4.40012
608	2	33593525	4.35655
609	2	33676821	3.81816
610	2	33676861	3.7167
611	2	33802295	4.24565
612	2	33802298	4.09098
613	2	33802310	4.24565
614	2	33802622	4.24565
615	2	33809416	3.67366
616	2	33809456	3.71444
617	2	33809497	3.67366
618	2	33891030	3.97469
619	2	34258996	4.49349
620	2	34259035	4.49349
621	2	34259060	4.49349
622	2	34632467	4.31069
623	2	34686228	4.45967
624	2	34729008	3.57025
625	2	34779305	3.06048
626	2	34779312	3.16115
627	2	34779317	3.06048
628	2	34779358	4.44977
629	2	34792726	4.56543
630	2	34792773	4.7122
631	2	34903896	4.98716
632	2	34903955	5.03763
633	2	34968869	0.742058
634	2	35485635	4.75449
635	2	35485644	4.75449
636	2	35485942	4.70333
637	2	35485947	4.75449
638	2	35485966	4.86967
639	2	35485987	4.75449
640	2	35514696	3.64782
641	2	35514699	3.62893
642	2	35514700	3.68403
643	2	35514708	3.68403
644	2	35848318	4.38405
645	2	35848666	4.42597
646	2	35854944	4.24489
647	2	35895180	3.25493
648	2	36244609	5.00877
649	2	36244631	4.84164
650	2	36514435	4.25337
651	2	37253076	4.46597
652	2	37253467	3.84164
653	2	37347051	2.50169
654	2	37417645	3.13312
655	2	37421547	4.44129
656	2	37421769	3.88606
657	2	37421804	4.12378
658	2	37450615	4.38091
659	2	37450624	4.63264
660	2	37450648	4.39362
661	2	37934838	3.81531
662	2	37934848	4.10458
663	2	38723010	3.39362
664	2	38723945	2.79588
665	2	38769287	2.70115
666	2	38769572	2.43771
667	2	38769573	2.52578
668	2	38769584	2.57675
669	2	38769587	2.49349
670	2	38769693	3.17457
671	2	38769719	3.02641
672	2	38769896	3.22695
673	2	38769899	3.22695
674	2	38769905	3.17457
675	2	38769938	3.17457
676	2	38769940	3.02549
677	2	38769941	3.02549
678	2	38769945	3.17457
679	2	43147763	0.0248762
682	3	533861	1.15503
683	3	657731	0.390406
684	3	657755	0.832269
685	3	895815	0.724873
686	3	895830	0.731797
687	3	895892	0.767029
688	3	920865	1.35223
689	3	920918	0.981924
690	3	921161	1.264
691	3	921218	0.96465
692	3	1001789	1.61943
693	3	1001813	1.6784
694	3	1002042	1.42678
695	3	1002123	1.46814
696	3	1516968	0.912751
697	3	1516970	0.667703
698	3	1516976	0.879953
699	3	1516982	1.00397
700	3	1516983	0.798357
701	3	1517381	0.255214
702	3	1517405	0.27215
703	3	1517423	0.0398766
704	3	1517432	0.336733
705	3	1517447	0.35011
706	3	1519411	0.527039
707	3	1519661	0.500725
708	3	1576245	0.864168
709	3	1576292	0.851799
710	3	1576303	0.764169
711	3	1651094	1.30918
712	3	1651098	1.20894
713	3	1651131	1.46788
714	3	1689044	1.53432
715	3	1689065	1.43098
716	3	1792000	0.750753
717	3	1792058	0.843875
718	3	1792074	0.871601
719	3	1792075	0.895206
720	3	1792083	0.743595
721	3	1792339	0.851459
722	3	1794805	0.731305
723	3	2048312	1.02004
724	3	2169231	0.369521
725	3	2169468	0.632346
726	3	2559171	0.507156
727	3	2694990	0.630728
728	3	2695036	0.493928
729	3	2695244	0.700841
730	3	2795743	0.24899
731	3	2870370	0.250851
732	3	2871105	0.534409
733	3	2959066	0.192709
734	3	2959102	0.165414
735	3	2959108	0.366622
736	3	2959136	0.382643
737	3	2959146	0.247207
738	3	2959536	0.322274
739	3	2959545	0.408101
740	3	2959548	0.2496
741	3	2959557	0.371836
742	3	2959572	0.172334
743	3	2959587	0.635674
744	3	2959650	0.753871
745	3	2961970	0.375388
746	3	3073422	0.504886
747	3	3073766	0.661763
748	3	3189370	0.642904
749	3	3189386	0.421888
750	3	3189893	0.617011
751	3	3213569	0.592405
752	3	3213584	0.592405
753	3	3213593	0.592405
754	3	3213826	0.74521
755	3	3236294	0.322639
756	3	3236321	0.161976
757	3	3236795	0.597635
758	3	3236796	0.57641
759	3	3236851	0.276323
760	3	3236853	0.29335
761	3	3236870	0.746832
762	3	3421860	0.224091
763	3	3421898	0.228648
764	3	3421900	0.456727
765	3	3421908	0.334729
766	3	3421936	0.348557
767	3	3421937	0.334729
768	3	3463192	0.38711
769	3	3463562	0.493333
770	3	3584237	0.4149
771	3	3874504	0.842453
772	3	3874577	0.815933
773	3	3874813	0.953778
774	3	3874825	0.942905
775	3	3889863	0.461565
776	3	3889880	0.410497
777	3	3889896	0.173964
778	3	3889905	0.306713
779	3	4016659	1.10496
780	3	4016673	0.635449
781	3	4016688	0.791908
782	3	4016837	0.864422
783	3	4016851	0.470647
784	3	4136215	0.485505
785	3	4136218	0.185493
786	3	4222629	0.0778872
787	3	4587988	0.430919
788	3	4795379	0.649074
789	3	4795390	0.839622
790	3	4795433	0.760025
791	3	4795879	0.619174
792	3	4871107	0.961698
793	3	4871317	0.541272
794	3	4871332	1.04431
795	3	4871350	0.893537
796	3	4871383	0.78513
797	3	5657274	0.47502
798	3	5657282	0.47502
799	3	5657295	0.529369
800	3	5657713	0.623277
801	3	5657742	0.650373
802	3	5657767	0.68884
803	3	5657865	0.744921
804	3	5657877	0.659358
805	3	5658299	0.768632
806	3	5814033	1.00993
807	3	5814034	1.06732
808	3	5830256	0.872636
809	3	5830304	0.913284
810	3	5849853	0.90309
811	3	5912529	0.954951
812	3	5912550	0.579896
813	3	5912992	0.872506
814	3	5913016	0.659477
815	3	5913037	0.792312
816	3	6072574	1.08286
817	3	6072592	1.32744
818	3	6075088	0.742201
819	3	6075137	0.889848
820	3	6075553	1.16418
821	3	6455250	0.810538
822	3	6455257	0.810538
823	3	6730977	0.722322
824	3	6731021	0.726189
825	3	7784630	0.745476
826	3	7928114	0.941726
827	3	7928147	0.941726
828	3	7928156	0.978315
829	3	7932607	0.801921
830	3	7932651	0.884123
831	3	7933065	0.800656
832	3	8990699	1.03607
833	3	8990725	1.19675
834	3	8990750	0.951908
835	3	8990963	1.17568
836	3	8990997	1.20537
837	3	8991018	1.16361
838	3	9054357	1.14285
839	3	9277610	1.13395
840	3	9328872	1.04518
841	3	9328892	1.04518
842	3	9329276	1.04518
843	3	9329320	1.02673
844	3	9453768	0.471791
845	3	9454056	0.471791
846	3	9713225	0.653139
847	3	9713273	0.632122
848	3	9713733	0.646334
849	3	9713754	0.795094
850	3	9713756	0.923979
851	3	10464641	0.44383
852	3	10464642	0.596725
853	3	10517535	1.01565
854	3	10672538	0.677657
855	3	10727378	1.02826
856	3	10773574	1.39426
857	3	10773619	1.03175
858	3	10809877	1.16711
859	3	10809878	0.925476
860	3	10809880	1.24154
861	3	10809896	1.06384
862	3	10831507	1.21853
863	3	10831519	1.08386
864	3	10831553	1.11839
865	3	10831559	1.21853
866	3	10831856	1.19389
867	3	10835282	1.25696
868	3	11227501	1.14339
869	3	11227513	1.14339
870	3	11227549	1.10991
871	3	11308507	0.546391
872	3	11309395	1.55486
873	3	11309791	1.55486
874	3	11366438	1.11679
875	3	11366467	0.844178
876	3	11587225	0.243859
877	3	11607278	0.652436
878	3	12364168	0.671152
879	3	12364169	0.658289
880	3	12364499	0.671152
881	3	12364534	0.671152
882	3	12648410	1.1659
883	3	12931286	1.092
884	3	12931292	0.981383
885	3	12931349	0.981383
886	3	13140451	0.657893
887	3	13140861	0.67805
888	3	13262779	0.625985
889	3	13355474	0.806514
890	3	13748596	0.625765
891	3	15190114	0.677388
892	3	15195676	0.285167
893	3	15195715	0.272597
894	3	15195741	0.42821
895	3	16010958	0.761502
896	3	16939778	0.544744
897	3	17386481	0.765635
898	3	17396613	0.711147
899	3	17498431	1.14454
900	3	17499041	0.783096
901	3	17835750	0.632551
902	3	20579894	1.5688
903	3	20579902	1.52681
904	3	20593709	1.34573
905	3	22460147	1.32744
906	3	23170430	1.43842
907	3	23291657	1.72932
908	3	23291687	1.72932
909	3	23292008	1.79048
910	3	23292009	1.79048
911	3	23869082	1.72862
912	3	23869364	1.57528
913	3	23869421	1.57528
914	3	23869424	1.5921
915	3	23869427	1.94006
916	3	24580011	1.64321
917	3	24580053	1.75129
918	3	24580067	1.75129
919	3	25165072	1.69616
920	3	25165514	1.69616
921	3	25165527	1.6704
922	3	25167321	1.0041
923	3	25167612	1.43133
924	3	25259144	1.79048
925	3	25259324	1.79452
926	3	25259341	1.80855
927	3	25259381	1.80855
928	3	25259391	1.80855
929	3	25377582	0.488036
930	3	26085822	1.06814
931	3	26085873	1.06814
932	3	26605005	1.63658
933	3	26731407	1.30478
934	3	27355300	1.38101
935	3	27355306	1.48598
936	3	27355330	1.48598
937	3	27355737	1.4618
938	3	27355779	1.4618
939	3	28054144	1.51613
940	3	28054174	1.03574
941	3	29277823	1.0961
942	3	29277858	1.0961
943	3	29278191	1.09838
944	3	29278204	1.0961
945	3	30922660	0.626555
946	3	31532823	0.838782
947	3	31742539	0.587187
948	3	31742569	0.677285
949	3	31743146	0.622366
950	3	31743167	0.689647
951	3	32023743	0.771215
952	3	32802363	0.174087
953	3	32802364	0.148515
954	3	32802365	0.157335
955	3	32987661	0.738737
956	3	33273545	0.60206
957	3	33273562	0.60206
958	3	33585811	0.848201
959	3	33585814	0.47589
960	3	33598271	0.641342
961	3	34105004	0.617407
962	3	34105006	0.617407
963	3	34105009	0.617407
964	3	34106791	0.681123
965	3	34106794	0.691713
966	3	34400991	0.473544
967	3	34401049	0.473544
968	3	34445618	0.782463
969	3	34445656	0.862646
970	3	34446032	0.771087
971	3	34446070	0.850935
972	3	34446089	0.771087
973	3	34446093	0.771087
974	3	34708297	0.19009
975	3	34708523	0.384429
976	3	34969647	0.279907
977	3	34969722	0.3779
978	3	34969724	0.3779
979	3	35394319	0.307506
980	3	35447255	0.34673
981	3	35464053	0.119472
982	3	35464117	0.213469
983	3	35464467	0.174314
984	3	35464468	0.120096
985	3	35464502	0.160101
986	3	35615161	0.0609053
987	3	35615210	1.54212
988	3	36495961	0.330153
989	3	36496333	0.330153
990	3	36509252	0.350208
991	3	36510918	0.22135
992	3	36510959	0.22135
993	3	36763194	0.17309
994	3	36779836	0.408101
995	3	36780277	0.417493
996	3	36780282	0.417493
997	3	36780689	0.105778
998	3	36780701	0.146898
999	3	36780723	0.0944092
1000	3	37505032	0.289654
1001	3	37516868	0.34976
1002	3	37517101	0.374184
1003	3	37766621	0.266281
1004	3	38153165	0.0213494
1005	3	38153214	0.0872308
1006	3	38153535	0.0801586
1007	3	39004313	0.148063
1008	3	39004316	0.148063
1009	3	39004360	0.148063
1010	3	39004366	0.148063
1011	3	39004661	0.148063
1012	3	39313022	0.198836
1013	3	39313034	0.111147
1014	3	39313040	0.216954
1015	3	39313054	0.136106
1016	3	39313056	0.0817337
1017	3	39313057	0.175952
1018	3	39313066	0.204412
1019	3	39313349	0.18532
1020	3	39313354	0.158684
1021	3	39491655	0.123424
1022	3	39491677	0.195016
1023	3	39491689	0.123424
1024	3	39491707	0.0629638
1025	3	39491715	0.0629638
1026	3	39491756	0.235742
1027	3	39491817	0.235742
1028	3	39492076	0.228935
1029	3	39566590	0.214976
1030	3	40178842	0.0649817
1031	3	40655573	0.207945
1032	3	40655584	0.146898
1033	3	40655603	0.305948
1034	3	40655614	0.0704585
1035	3	40696305	0.11245
1036	3	40696318	0.106566
1037	3	40902869	0.143622
1038	3	40902909	0.143622
1039	3	40997016	0.123038
1040	3	40997036	0.123038
1041	3	40997039	0.0983564
1042	3	41297542	0.00413237
1043	3	41297550	0.00279279
1044	3	41298563	0.014879
1045	3	41298567	0.014879
1046	3	41298575	0.014879
1047	3	41298589	0.014879
1048	3	41320374	0.00255682
1049	3	41320376	0.0241318
1050	3	41320378	0.0241318
1051	3	41320381	0.0155672
1052	3	41347653	0.0576
1053	3	41397532	0.0508736
1054	3	41678879	0.0357687
1055	3	41679203	0.0422539
1056	3	41695875	0.0437355
1057	3	41695881	0.0593839
1058	3	41696243	0.0593839
1059	3	41727549	0.0681558
1060	3	41727551	0.0549452
1061	3	41727576	0.0537001
1062	3	41728047	0.0537001
1063	3	42336028	0.0688932
1064	3	42357458	0.0710923
1065	3	42435980	0.0255113
1066	3	42436038	0.0255113
1067	3	42436316	0.0255113
1068	3	42436331	0.0293603
1069	3	42436356	0.0255113
1070	3	42730973	0.0226423
1071	3	43005776	0.0596031
1072	3	43006204	0.0541967
1073	3	43013437	0.110766
1074	3	43013448	0.0579076
1075	3	43013464	0.110766
1076	3	43013483	0.110766
1077	3	43013488	0.110766
1078	3	43013489	0.110766
1079	3	43013491	0.111119
1080	3	43014405	0.150691
1081	3	43014437	0.21073
1082	3	43014440	0.368648
1083	3	43014456	0.166974
1084	3	43014463	0.362851
1085	3	43014770	0.230926
1086	3	43020241	0.0559667
1087	3	43382270	0.0264704
1088	3	43382573	0.0132775
1089	3	43842274	0.00134405
1090	3	43874503	0.0474497
1091	3	44211997	0.107221
1092	3	44212024	0.107221
1093	3	44212025	0.107221
1094	3	44212027	0.214279
1095	3	44212307	0.0972359
1096	3	44212315	0.141794
1097	3	44212335	0.196454
1098	3	44212369	0.11168
1099	3	44253782	0.248705
1100	3	44253825	0.0960423
1101	3	44253830	0.248705
1102	3	44258679	0.479438
1103	3	44258719	0.362891
1104	3	44258720	0.362891
1105	3	44258758	0.362891
1106	3	44258893	0.454829
1107	3	44258911	0.362891
1108	3	44258917	0.362891
1109	3	44419277	0.143036
1110	3	44538908	0.0911345
1111	3	44631209	0.328244
1112	3	44643743	0.101182
1113	3	44643744	0.0861914
1114	3	44690713	0.00390443
1115	3	44690746	0.00871189
1116	3	44690767	0.0240354
1117	3	44722238	0.171656
1118	3	44722243	0.0820064
1119	3	44722278	0.0820064
1120	3	44795079	0.374441
1121	3	44795337	0.828069
1122	3	44795340	0.37202
1123	3	44795358	0.372737
1124	3	44795373	0.482936
1125	3	45011930	0.48402
1126	3	45011937	0.191816
1127	3	45011957	0.0162925
1128	3	45011963	0.217277
1129	3	45058288	0.081435
1130	3	45077700	0.0940801
1131	3	45080770	0.0772901
1132	3	45080771	0.0772901
1133	3	45081113	0.101045
1134	3	45081155	0.101045
1135	3	45438989	0.0354293
1136	3	45439026	0.51347
1137	3	45878115	0.00534417
1138	3	46142120	0.119084
1139	3	46142140	0.119084
1140	3	46142144	0.119084
1141	3	46142174	0.119084
1142	3	46142393	0.0632903
1143	3	46147846	0.0925241
1144	3	46351078	0.00451837
1145	3	46386962	0.00971
1146	3	46433799	0.0206747
1147	3	46433823	0.213476
1148	3	46433826	0.308644
1149	3	46433871	0.0933418
1150	3	46434143	0.178559
1151	3	46434186	0.102021
1152	3	46434193	0.156338
1153	3	46434213	0.0598771
1154	3	46434216	0.421177
1155	3	46973340	0.110586
1156	3	47271484	0.195132
1157	3	47271535	0.152082
1158	3	47271807	0.119747
1159	3	47271816	0.120411
1160	3	47271853	0.126581
1161	3	47271875	0.126581
1162	3	47302806	0.0391013
1163	3	47302845	0.0712356
1164	3	47303287	0.0790736
1165	3	47370469	0.493089
1166	3	47370706	0.189976
1167	3	48365295	0.949968
1168	3	48365299	0.0320123
1169	3	48365301	0.0725886
1170	3	48365318	0.0371006
1171	3	48365367	0.70058
1172	3	48365368	0.479385
1173	3	48365372	0.154741
1174	3	48365373	0.318379
1175	3	48365874	0.351123
1176	3	48366003	0.851891
1177	3	48366084	0.0626777
1178	3	48547863	0.559091
1179	3	48547885	0.804405
1180	3	48548372	0.7827
1181	3	48797994	0.29902
1182	3	48798283	0.328762
1183	3	48854231	0.0234941
1184	3	48854232	0.0372378
1185	3	48854427	0.0204243
1186	3	48867923	0.410989
1187	3	49330559	0.0233612
1188	3	49330610	0.0233612
1189	3	49330620	0.0233612
1190	3	49341763	0.0499663
1191	3	49342190	0.109249
1192	3	49342243	0.133045
1193	3	49374249	0.153923
1194	3	49378322	0.0861385
1195	3	49453655	0.165993
1196	3	49453662	0.0813878
1197	3	49453667	0.152008
1198	3	49453682	0.165993
1199	3	49453703	0.152008
1200	3	49453737	0.139722
1201	3	49454054	0.0777314
1202	3	49454091	0.0733232
1203	3	49477841	0.126854
1204	3	49729792	0.0405007
1205	3	49729793	0.0249544
1206	3	49729817	0.164811
1207	3	49729854	0.101906
1208	4	2823566	0.443951
1209	4	4503022	0.240257
1210	4	4512660	0.272988
1211	4	4512999	0.272988
1212	4	4642054	0.0670141
1213	4	6249730	0.450568
1214	4	6249751	0.450568
1215	4	6249774	0.421728
1216	4	9113903	0.168207
1217	4	9159211	0.224353
1218	4	9159222	0.205972
1219	4	9159292	0.267116
1220	4	9159652	0.280437
1221	4	9234049	0.328346
1222	4	9258934	0.251765
1223	4	9258967	0.260752
1224	4	9432162	0.34645
1225	4	9516363	0.0689695
1226	4	9600473	0.194825
1227	4	9600488	0.246923
1228	4	9600992	0.189781
1229	4	9765430	0.0344314
1230	4	9765439	0.188747
1231	4	9765462	0.288235
1232	4	9765464	0.102984
1233	4	9765486	0.119312
1234	4	9765495	0.110861
1235	4	9765956	0.106066
1236	4	10031111	0.244095
1237	4	10687829	0.413233
1238	4	10687836	1.33171
1239	4	10687848	0.718876
1240	4	10687855	2.19997
1241	4	10921023	0.327385
1242	4	10921036	0.343442
1243	4	10921241	0.209975
1244	4	10921252	0.35443
1245	4	10921262	0.327385
1246	4	10921277	0.246325
1247	4	10921291	0.343442
1248	4	11298856	0.18706
1249	4	11298860	0.342132
1250	4	11298892	0.171347
1251	4	11299207	0.284381
1252	4	11299249	0.275659
1253	4	11299269	0.275659
1254	4	11299282	0.215276
1255	4	11346010	0.227788
1256	4	11346087	0.337658
1257	4	11498155	0.467144
1258	4	11498184	0.441591
1259	4	11559629	0.467959
1260	4	11559983	0.501138
1261	4	11604095	0.263843
1262	4	11604358	0.2788
1263	4	11604369	0.424247
1264	4	11604375	0.263843
1265	4	11604392	0.2364
1266	4	12174634	0.233855
1267	4	12174635	0.233855
1268	4	12498934	0.47723
1269	4	12543376	0.444845
1270	4	12557623	0.486889
1271	4	12557849	0.460435
1272	4	12557919	0.460435
1273	4	12869277	0.678132
1274	4	12869342	0.678132
1275	4	13378042	0.665004
1276	4	13383315	0.469314
1277	4	13383713	0.549843
1278	4	13383740	0.380031
1279	4	13648742	0.532052
1280	4	13648751	0.48817
1281	4	13763510	0.604604
1282	4	13763532	0.608641
1283	4	13763965	0.608641
1284	4	13766711	0.438171
1285	4	13766726	0.622475
1286	4	13793146	0.389691
1287	4	13793150	0.395374
1288	4	13811948	0.386507
1289	4	13811951	0.478587
1290	4	13811972	0.629765
1291	4	13812004	0.742874
1292	4	13812350	0.933264
1293	4	16473590	0.78912
1294	4	16473611	0.784336
1295	4	16473629	0.784336
1296	4	16474056	0.681811
1297	4	16474076	0.703774
1298	4	16478872	0.836988
1299	4	16479134	0.512862
1300	4	16479136	0.657025
1301	4	16479141	1.17744
1302	4	16526170	0.768046
1303	4	16526180	0.768046
1304	4	16565662	0.802003
1305	4	16565705	0.802003
1306	4	16565739	0.748289
1307	4	16565998	0.600015
1308	4	16566000	0.6495
1309	4	16566001	0.592167
1310	4	16566010	0.748289
1311	4	16566015	0.678422
1312	4	16900152	1.52201
1313	4	17011287	0.496427
1314	4	17011717	0.810061
1315	4	17011757	0.82157
1316	4	18043014	0.862678
1317	4	18159534	0.875757
1318	4	18159928	0.875757
1319	4	18160507	0.576295
1320	4	18160514	0.576295
1321	4	18160810	0.576295
1322	4	18160846	0.576295
1323	4	18222628	0.238268
1324	4	18222651	0.437065
1325	4	19012171	1.1604
1326	4	19039817	0.258675
1327	4	19039835	0.42321
1328	4	19039973	0.00281464
1329	4	19039988	0.019365
1330	4	19039997	0.00599097
1331	4	19040006	0.0417802
1332	4	19040018	0.0730045
1333	4	19040027	0.240929
1334	4	19040032	0.240929
1335	4	19040036	0.20346
1336	4	19040054	0.0245636
1337	4	19945394	1.20852
1338	4	20330296	0.72386
1339	4	20330309	0.72386
1340	4	20330359	0.72386
1341	4	20365655	0.643439
1342	4	20365681	0.643439
1343	4	20527840	0.461075
1344	4	20528259	0.454569
1345	4	20528269	0.454569
1346	4	20528300	0.454569
1347	4	20589731	0.959516
1348	4	20589774	0.959516
1349	4	20590205	0.959516
1350	4	20789728	0.0781419
1351	4	20789771	0.182468
1352	4	20789797	0.0606655
1353	4	20790022	0.0605107
1354	4	20804416	0.397614
1355	4	20865898	1.23344
1356	4	20866188	0.804322
1357	4	21175838	0.625362
1358	4	21230405	0.907385
1359	4	21230691	0.963491
1360	4	21376602	0.335189
1361	4	21376639	0.335189
1362	4	21415138	0.489093
1363	4	21415143	0.538847
1364	4	21415173	0.476982
1365	4	21415179	0.466571
1366	4	21415180	0.360504
1367	4	21415202	0.418745
1368	4	21426270	0.730954
1369	4	21426285	0.730954
1370	4	21426728	0.730954
1371	4	21945061	0.34727
1372	4	22048086	1.60924
1373	4	22162434	0.420102
1374	4	22162670	0.420102
1375	4	22302902	0.552982
1376	4	22307872	0.218158
1377	4	22308060	0.218316
1378	4	22308064	0.259077
1379	4	22308112	0.255058
1380	4	22308128	0.189929
1381	4	22328188	0.315586
1382	4	22671390	0.211973
1383	4	22671391	0.284598
1384	4	22678100	0.123603
1385	4	22678139	0.0817022
1386	4	22780037	0.166509
1387	4	22780040	0.0413597
1388	4	22780045	0.0413597
1389	4	22780049	0.150396
1390	4	22780118	0.302117
1391	4	22780294	0.024821
1392	4	22929218	0.0985253
1393	4	22929584	0.109529
1394	4	22929617	0.136136
1395	4	22929648	0.17203
1396	4	22929673	0.136136
1397	4	23152808	0.441171
1398	4	23152814	0.57787
1399	4	23152936	0.206391
1400	4	23152939	0.449307
1401	4	23220877	0.143392
1402	4	23311219	0.0607204
1403	4	23311220	0.0607204
1404	4	23311222	0.0607204
1405	4	23328614	0.00496182
1406	4	23328621	0.0426753
1407	4	23328668	0.0135911
1408	4	23355435	0.130633
1409	4	23355481	0.0680339
1410	4	23355762	0.115097
1411	4	23355772	0.123413
1412	4	23355829	0.137421
1413	4	23438357	0.175341
1414	4	23438385	0.288859
1415	4	23438700	0.170548
1416	4	23438721	0.166381
1417	4	23438730	0.170548
1418	4	23438742	0.170548
1419	4	23472280	0.0247199
1420	4	23472284	0.0338958
1421	4	23472548	0.0631094
1422	4	23472562	0.0631094
1423	4	23488982	0.128573
1424	4	23489210	0.0970675
1425	4	23489278	0.0536509
1426	4	23496081	0.197904
1427	4	23496117	0.197904
1428	4	23586935	0.162828
1429	4	23586959	0.069749
1430	4	23747615	0.0435962
1431	4	24523433	0.24906
1432	4	24523442	0.266875
1433	4	24582274	0.156362
1434	4	24582312	0.264753
1435	4	24658379	0.0784644
1436	4	24658419	0.133683
1437	4	24673136	0.165115
1438	4	24675050	0.231665
1439	4	24675069	0.231665
1440	4	24675094	0.231665
1441	4	24675472	0.549812
1442	4	24675502	0.62202
1443	4	24925959	0.149832
1444	4	24943109	0.0165902
1445	4	24993451	0.338329
1446	4	24993532	0.313257
1447	4	25191871	0.140477
1448	4	25191880	0.140477
1449	4	25191888	0.0989342
1450	4	25191938	0.140477
1451	4	25275729	0.0780587
1452	4	25660404	0.249175
1453	4	25660405	0.232347
1454	4	25660740	0.251138
1455	4	25660762	0.219244
1456	4	25683244	0.423003
1457	4	25884100	0.150722
1458	4	25884201	0.110592
1459	4	25884586	0.164075
1460	4	25884639	0.239615
1461	4	27097919	1.11776
1462	4	27116094	0.687844
1463	4	27116117	0.687844
1464	4	27170453	0.693403
1465	4	28178723	0.135181
1466	4	28526530	0.202629
1467	4	28919861	0.73888
1468	4	29749853	0.13095
1469	4	30313484	0.606548
1470	4	30313485	0.683485
1471	4	30313491	0.606548
1472	4	30696309	0.164531
1473	4	30696313	0.434258
1474	4	30696327	0.408746
1475	4	30866232	0.353116
1476	4	30866249	0.378087
1477	4	30866625	0.360543
1478	4	30866679	0.474864
1479	4	31047043	0.959239
1480	4	31047064	0.895445
1481	4	31047065	0.895445
1482	4	31047120	0.855675
1483	4	31047331	0.718194
1484	4	31276491	0.986868
1485	4	31314461	1.03886
1486	4	31314917	1.06859
1487	4	31392014	0.871278
1488	4	31866487	1.12177
1489	4	31912736	0.867516
1490	4	32068085	0.336308
1491	4	32074297	0.623971
1492	4	32074318	0.702108
1493	4	32074323	1.04398
1494	4	32074339	0.828917
1495	4	32074348	0.623971
1496	4	32074349	0.702108
1497	4	32074350	0.523154
1498	4	32074572	0.702108
1499	4	32406167	0.363412
1500	4	32463663	0.41384
1501	4	32471100	0.446967
1502	4	32471109	0.311954
1503	4	32471115	0.446967
1504	4	32471597	0.190198
1505	4	32471608	0.394103
1506	4	32471610	0.431916
1507	4	32471616	0.333435
1508	4	32493294	0.473079
1509	4	32493347	0.473079
1510	4	33752584	0.371039
1511	4	33752597	0.510337
1512	4	33756257	1.13324
1513	4	33770294	0.682919
1514	4	33879538	0.744438
1515	4	33879548	0.744438
1516	4	33879553	0.744438
1517	4	33879555	0.744438
1518	4	33879913	0.744438
1519	4	33879951	0.744438
1520	4	34283519	0.463972
1521	4	34524771	0.096872
1522	4	34524779	0.096872
1523	4	34524788	0.096872
1524	4	34524797	0.096872
1525	4	34530006	0.135625
1526	4	34587677	0.135335
1527	4	34614303	0.240453
1528	4	34614340	0.238185
1529	4	34614667	0.240453
1530	4	34743531	0.487342
1531	4	34826429	0.141367
1532	4	35526062	0.282063
1533	4	35526093	0.282063
1534	4	35526442	0.282063
1535	4	35649390	0.115261
1536	4	35794667	0.332052
1537	5	261590	0.204871
1538	5	261591	0.350227
1539	5	262062	0.828449
1540	5	262082	0.0861756
1541	5	270650	0.917646
1542	5	270662	0.527375
1543	5	270693	0.917646
1544	5	332099	1.10585
1545	5	332438	1.10585
1546	5	332468	1.06248
1547	5	332481	1.06248
1548	5	1172167	0.838183
1549	5	1617972	1.1201
1550	5	1645829	0.368932
1551	5	1955497	1.30321
1552	5	1955512	1.40938
1553	5	1955517	1.69186
1554	5	1972388	0.75183
1555	5	1972393	0.75183
1556	5	1972418	0.881041
1557	5	1972782	0.635093
1558	5	1972809	0.75183
1559	5	2100320	0.878342
1560	5	2100327	0.878342
1561	5	2100365	0.878342
1562	5	2236259	1.8274
1563	5	2236296	1.8274
1564	5	2324685	1.48718
1565	5	2324962	1.48718
1566	5	2324970	1.48718
1567	5	2325007	1.48718
1568	5	2325008	1.48718
1569	5	2325010	1.58436
1570	5	2379660	2.03905
1571	5	2379708	1.68256
1572	5	2380090	1.99697
1573	5	2588054	2.16622
1574	5	2588627	2.14206
1575	5	3856227	1.61332
1576	5	3873270	1.27918
1577	5	3928484	0.935056
1578	5	3928865	1.2186
1579	5	4323785	1.69984
1580	5	4358761	1.54046
1581	5	4452130	1.13059
1582	5	4452137	0.90946
1583	5	4452560	1.14406
1584	5	4452617	0.954012
1585	5	4452620	1.13727
1586	5	4452662	1.75105
1587	5	4452945	0.95499
1588	5	4452953	1.18085
1589	5	4638496	0.979722
1590	5	4638905	1.47147
1591	5	4756173	0.660668
1592	5	4757245	0.868317
1593	5	4757561	0.73351
1594	5	4757577	0.868317
1595	5	4757586	0.868317
1596	5	4847734	1.37018
1597	5	4848104	1.32689
1598	5	4920285	0.859712
1599	5	4920334	1.00279
1600	5	4920342	1.01818
1601	5	4920672	1.02683
1602	5	5196753	0.787759
1603	5	5196781	1.09593
1604	5	5196795	1.25274
1605	5	5196797	1.16323
1606	5	5304887	1.09583
1607	5	5305240	1.20705
1608	5	5365045	1.26938
1609	5	5365375	1.34631
1610	5	5464539	0.0276722
1611	5	5563376	1.24772
1612	5	5563411	1.32938
1613	5	5638009	1.63489
1614	5	5821135	1.0537
1615	5	5821168	0.865982
1616	5	5821182	1.03739
1617	5	5821210	1.18569
1618	5	5823008	1.16986
1619	5	5823012	1.06505
1620	5	5823046	1.26177
1621	5	5823490	1.48692
1622	5	5823504	1.48692
1623	5	5823507	1.48692
1624	5	7232635	1.51371
1625	5	7234320	2.00261
1626	5	7281899	1.33583
1627	5	7314931	1.73424
1628	5	7314955	1.81135
1629	5	7524568	1.45581
1630	5	7881552	1.55533
1631	5	8090323	2.21538
1632	5	8194977	2.06702
1633	5	8878544	2.10679
1634	5	9006445	2.40561
1635	5	9006451	2.23958
1636	5	9006461	2.24413
1637	5	9006471	2.24413
1638	5	9006481	2.24413
1639	5	9029665	2.15739
1640	5	9029696	2.15739
1641	5	11540988	1.50794
1642	5	11540998	1.32569
1643	5	11541000	1.00083
1644	5	11541018	1.50794
1645	5	11541033	1.50794
1646	5	11603125	2.98297
1647	5	12657590	1.83416
1648	5	12657601	1.75523
1649	5	12657999	1.75523
1650	5	12658056	1.54668
1651	5	12929263	1.54561
1652	5	13591533	2.16622
1653	5	13688877	1.84894
1654	5	13688906	1.84894
1655	5	13764121	2.15181
1656	5	13766000	2.31695
1657	5	13890392	2.13194
1658	5	14305159	2.40121
1659	5	14305418	2.87943
1660	5	14315801	2.65956
1661	5	14316137	3.0511
1662	5	14998923	2.20691
1663	5	14998933	2.02687
1664	5	14999117	2.20691
1665	5	15021871	2.01773
1666	5	15117250	3.02872
1667	5	15117482	3.02872
1668	5	15117488	2.64975
1669	5	15413012	2.9431
1670	5	16014065	2.95861
1671	5	16069512	2.1512
1672	5	17460640	3.10568
1673	5	17460646	3.23582
1674	5	17680024	2.29328
1675	5	17680080	2.23657
1676	5	17764337	3.55909
1677	5	17764342	3.50307
1678	5	17764597	3.40121
1679	5	17771855	3.62709
1680	5	17771900	3.62709
1681	5	20104991	2.8041
1682	5	20105303	2.8041
1683	5	20105317	2.8041
1684	5	20265999	3.59517
1685	5	20266380	3.39254
1686	5	20266942	3.52724
1687	5	21363278	3.75696
1688	5	21363279	3.75696
1689	5	21363304	3.76447
1690	5	21613363	4.29158
1691	5	21614676	3.88273
1692	5	21681829	3.65365
1693	5	21681870	3.65365
1694	5	21681880	3.65365
1695	5	21682297	3.65365
1696	5	21807820	3.71444
1697	5	22998681	3.91009
1698	5	23176695	3.18575
1699	5	23176701	3.57187
1700	5	23176770	3.3363
1701	5	23177026	3.57187
1702	5	23177098	3.3363
1703	5	23591529	4.42829
1704	5	25294345	3.99568
1705	5	25294362	3.61261
1706	5	25294377	3.48413
1707	5	25294396	3.74958
1708	5	25294720	3.99568
1709	5	25294726	3.58838
1710	5	26044115	4.98297
1711	5	26044595	4.91009
1712	5	26044633	4.7986
1713	5	26044635	4.98297
1714	5	26044673	4.59688
1715	5	26356097	3.92082
1716	5	26356099	3.92082
1717	5	26356290	4.05404
1718	5	26356296	4.00261
1719	5	26356303	3.65956
1720	5	26356306	4.20621
1721	5	26356398	4.97469
1722	5	26356405	4.97469
1723	5	26356704	4.97469
1724	5	26356778	4.98716
1725	5	26410434	4.43297
1726	5	26424366	2.69037
1727	5	26424368	3.54821
1728	5	26424396	3.10902
1729	5	26424411	3.60906
1730	5	26424441	2.83565
1731	5	26445880	2.74958
1732	5	26822940	4.69897
1733	5	26822946	4.69897
1734	5	26823920	5.19723
1735	5	27129078	6.04048
1736	5	27130442	5.74473
1737	5	27130512	5.53313
1738	5	27655565	5.77469
1739	5	27761897	5.82391
1740	5	27816147	5.34679
1741	5	27816560	5.92082
1742	5	28257740	5.95468
1743	5	28539605	5.53165
1744	5	28539659	5.53165
1745	5	28649369	4.21681
1746	5	28966465	4.82102
1747	5	29323482	6.13608
1748	5	29323514	5.60206
1749	5	29323548	5.86967
1750	5	29323992	5.54061
1751	5	29324000	5.60206
1752	5	29324149	5.28819
1753	5	29337124	6.62893
1754	5	29337177	6.56543
1755	5	29516253	5.29243
1756	5	29894660	5.56543
1757	5	29991364	4.02
1758	5	29991406	4.58004
1759	5	29991682	4.56225
1760	5	29991752	3.97469
1761	5	30277025	5.04335
1762	5	30306405	4.08619
1763	5	30561829	5.53165
1764	5	30562104	5.22988
1765	5	30563308	5.5544
1766	5	30563720	5.5544
1767	5	30563721	5.5544
1768	5	30638670	5.68825
1769	5	30708515	5.15802
1770	5	31012642	4.79588
1771	5	31012689	5.06753
1772	5	31012971	4.15552
1773	5	31121589	5.87615
1774	5	31121863	5.95861
1775	5	31131303	5.64975
1776	5	31134937	5.21538
1777	5	31773742	5.18177
1778	5	32194074	0.83354
1779	5	32194089	0.831326
1780	5	32225229	4.57512
1781	5	32305700	5.5817
1782	5	32305715	5.53313
1783	5	32305993	5.53313
1784	5	32704702	5.13847
1785	5	32704817	5.5391
1786	5	32704849	5.59176
1787	5	32704865	5.59176
1788	5	32705255	5.59176
1789	5	32813470	5.33255
1790	5	32813882	5.33255
1791	5	32976713	4.66959
1792	5	32976735	4.9914
1793	5	32976942	4.97881
1794	5	32976951	4.77728
1795	5	32976959	5.18509
1796	5	32976968	5.12148
1797	5	33141363	4.97881
1798	5	33141413	4.98297
1799	5	33153798	4.63451
1800	5	33153810	4.50864
1801	5	33153819	4.73049
1802	5	33274030	4.36653
1803	5	33274048	4.36653
1804	5	33274084	4.25493
1805	5	33274286	4.25493
1806	5	33274337	4.03245
1807	5	33274342	4.05799
1808	5	33490010	5.54212
1809	5	33622688	4.32883
1810	5	33622980	5.08249
1811	5	33804740	4.99568
1812	5	33804761	5.36653
1813	5	33901004	5.50724
1814	5	33941650	5.67162
1815	5	33941657	5.79588
1816	5	33966982	5.06349
1817	5	33967001	5.44855
1818	5	33967539	5.04335
1819	5	34047254	4.95468
1820	5	34047257	4.95468
1821	5	34047290	4.80134
1822	5	34047311	4.8962
1823	5	34063185	5.46344
1824	5	34063246	5.46344
1825	5	34063567	5.46344
1826	5	34063589	5.46344
1827	5	34674320	1.6396
1828	5	34674328	1.27671
1829	5	34674356	1.30382
1830	5	34674358	1.35833
1831	5	34674360	1.27515
1832	5	34674364	1.08794
1833	5	34674623	1.33311
1834	5	34674650	1.12188
1835	5	34674664	1.7841
1836	5	34674685	1.49839
1837	5	34702073	5.20901
1838	5	34861053	6.07831
1839	5	34861330	5.73518
1840	5	34861369	6.10237
1841	5	34909964	5.57025
1842	5	34918191	4.42481
1843	5	35164274	5.26922
1844	5	35164284	5.26922
1845	5	35164318	5.26922
1846	5	35401656	4.11295
1847	5	35401982	4.42481
1848	5	35402006	4.42481
1849	5	35406957	3.94692
1850	5	35406971	3.94692
1851	5	35406973	3.94692
1852	5	35407004	3.88941
1853	5	35407014	3.94692
1854	5	35407366	3.94692
1855	5	35407405	3.92812
1856	5	35407411	3.92812
1857	5	35407414	3.92812
1858	5	35407450	3.92812
1859	5	35407843	3.92812
1860	5	35407863	3.92812
1861	5	35407891	3.92812
1862	5	35659542	4.77989
1863	5	35659845	4.77989
1864	5	35659853	4.4045
1865	5	35659857	4.77989
1866	5	35659884	4.77989
1867	5	35794612	3.85387
1868	5	35794642	3.81531
1869	5	35816622	4.65365
1870	5	35816668	4.65365
1871	5	35874852	4.65365
1872	5	35874856	4.47756
1873	5	36461977	4.04528
1874	5	36462002	4.04528
1875	5	36462037	3.90309
1876	5	36462350	3.07417
1877	5	36462355	3.87615
1878	5	36462605	0.898631
1879	5	36462659	4.20343
1880	5	36462965	1.13948
1881	5	36462981	3.69037
1882	5	36522220	3.18776
1883	5	36522676	3.18642
1884	5	36622814	3.78516
1885	5	36622844	3.78516
1886	5	36724899	3.59007
1887	5	36724907	3.88941
1888	5	36724911	3.88941
1889	5	36724934	3.59007
1890	5	36724935	3.59007
1891	5	36725245	3.59007
1892	5	36752806	4.12494
1893	5	36782050	1.81645
1894	5	36782067	2.81531
1895	5	36782069	2.24109
1896	5	36782087	1.81645
1897	5	36782094	3.08778
1898	5	36782433	3.73755
1899	5	37414525	3.55596
1900	5	37415064	3.55596
1901	5	37415065	3.55596
1902	5	37415066	3.55596
1903	5	37539486	4.61261
1904	5	37553465	0.521044
1905	5	37553516	1.97428
1906	5	37553554	0.200763
1907	5	37873020	2.96257
1908	5	38266195	3.67778
1909	5	38338447	3.98716
1910	5	38338463	3.98716
1911	5	38371645	3.77469
1912	5	38502733	4.47496
1913	5	38503024	4.36452
1914	5	38503030	4.06601
1915	5	38757777	3.52871
1916	5	38757823	3.29414
1917	5	38757834	3.29414
1918	5	38757836	3.29414
1919	5	38757839	3.40782
1920	5	38757844	3.29414
1921	5	38809684	2.66959
1922	5	38810184	3.13253
1923	5	38823369	4.20831
1924	5	38823760	3.98297
1925	5	38842693	3.95861
1926	5	38878292	3.57675
1927	5	38908900	3.21753
1928	5	39247011	3.22988
1929	5	39247024	3.31515
1930	5	39247398	3.21753
1931	5	39247400	3.21753
1932	5	39489714	2.46471
1933	5	39615551	2.73518
1934	5	39616015	2.6925
1935	5	39660097	3.0511
1936	5	39682642	2.27084
1937	5	39682648	2.27084
1938	5	39682984	2.27084
1939	5	39683002	2.27084
1940	5	39683679	2.09528
1941	5	39766315	2.12668
1942	5	39766335	2.03574
1943	5	39766601	2.12668
1944	5	39794704	1.99055
1945	5	39795003	2.59517
1946	5	39795020	2.2204
1947	5	39840889	2.11805
1948	5	39840910	2.11805
1949	5	39962767	2.19586
1950	5	39962787	2.19586
1951	5	39967343	3.05899
1952	5	39967376	3.05899
1953	5	39967820	3.05899
1954	5	39967839	2.83565
1955	5	40578858	4.17134
1956	5	40722022	2.64782
1957	5	40722293	3.09044
1958	5	40722309	3.03339
1959	5	40722348	3.35164
1960	5	40891002	3.86967
1961	5	41489101	3.28819
1962	5	41489412	3.49485
1963	5	41521493	3.07109
1964	5	41521913	3.15864
1965	5	41521931	3.20621
1966	5	41521944	3.12148
1967	5	41521954	3.18177
1968	5	41529017	2.20273
1969	5	41529416	1.9108
1970	5	41529417	2.37366
1971	5	41615783	3.46597
1972	6	64253	2.37986
1973	6	220515	1.52622
1974	6	220547	1.77186
1975	6	220585	2.1261
1976	6	235272	2.27819
1977	6	235613	2.14752
1978	6	235624	2.13312
1979	6	235626	2.29328
1980	6	235642	2.13312
1981	6	529686	2.80134
1982	6	529694	2.61439
1983	6	529950	2.89279
1984	6	530005	2.89279
1985	6	552611	3.51428
1986	6	724415	4.54516
1987	6	724429	4.41908
1988	6	724432	4.41908
1989	6	724435	4.41908
1990	6	724707	4.43652
1991	6	739510	3.89963
1992	6	739532	3.89963
1993	6	739809	4.20901
1994	6	739849	4.20901
1995	6	739853	4.20901
1996	6	739854	4.36856
1997	6	739862	4.19382
1998	6	975284	3.03716
1999	6	975285	3.12668
2000	6	975793	3.12668
2001	6	996681	3.9393
2002	6	996709	3.57349
2003	6	1526403	4.74958
2004	6	2006834	5.21896
2005	6	2120432	5.3279
2006	6	2121192	0.55961
2007	6	2212142	6.03858
2008	6	2212147	6.54363
[truncated: 1,097 more rows]
