# Supplementary material for: Genome-wide Association Study and Possible Candidate Genes for Root Color and Carotenoid Contents in Japanese Orange Carrot F2 Populations
Source: Research Square preprint supplement (doi:10.21203/rs.3.rs-1014140/v1), 2021-11-10
Supplement: Supplementary file 1 [file ee85b15f0d1c747c4688dd29.pdf]

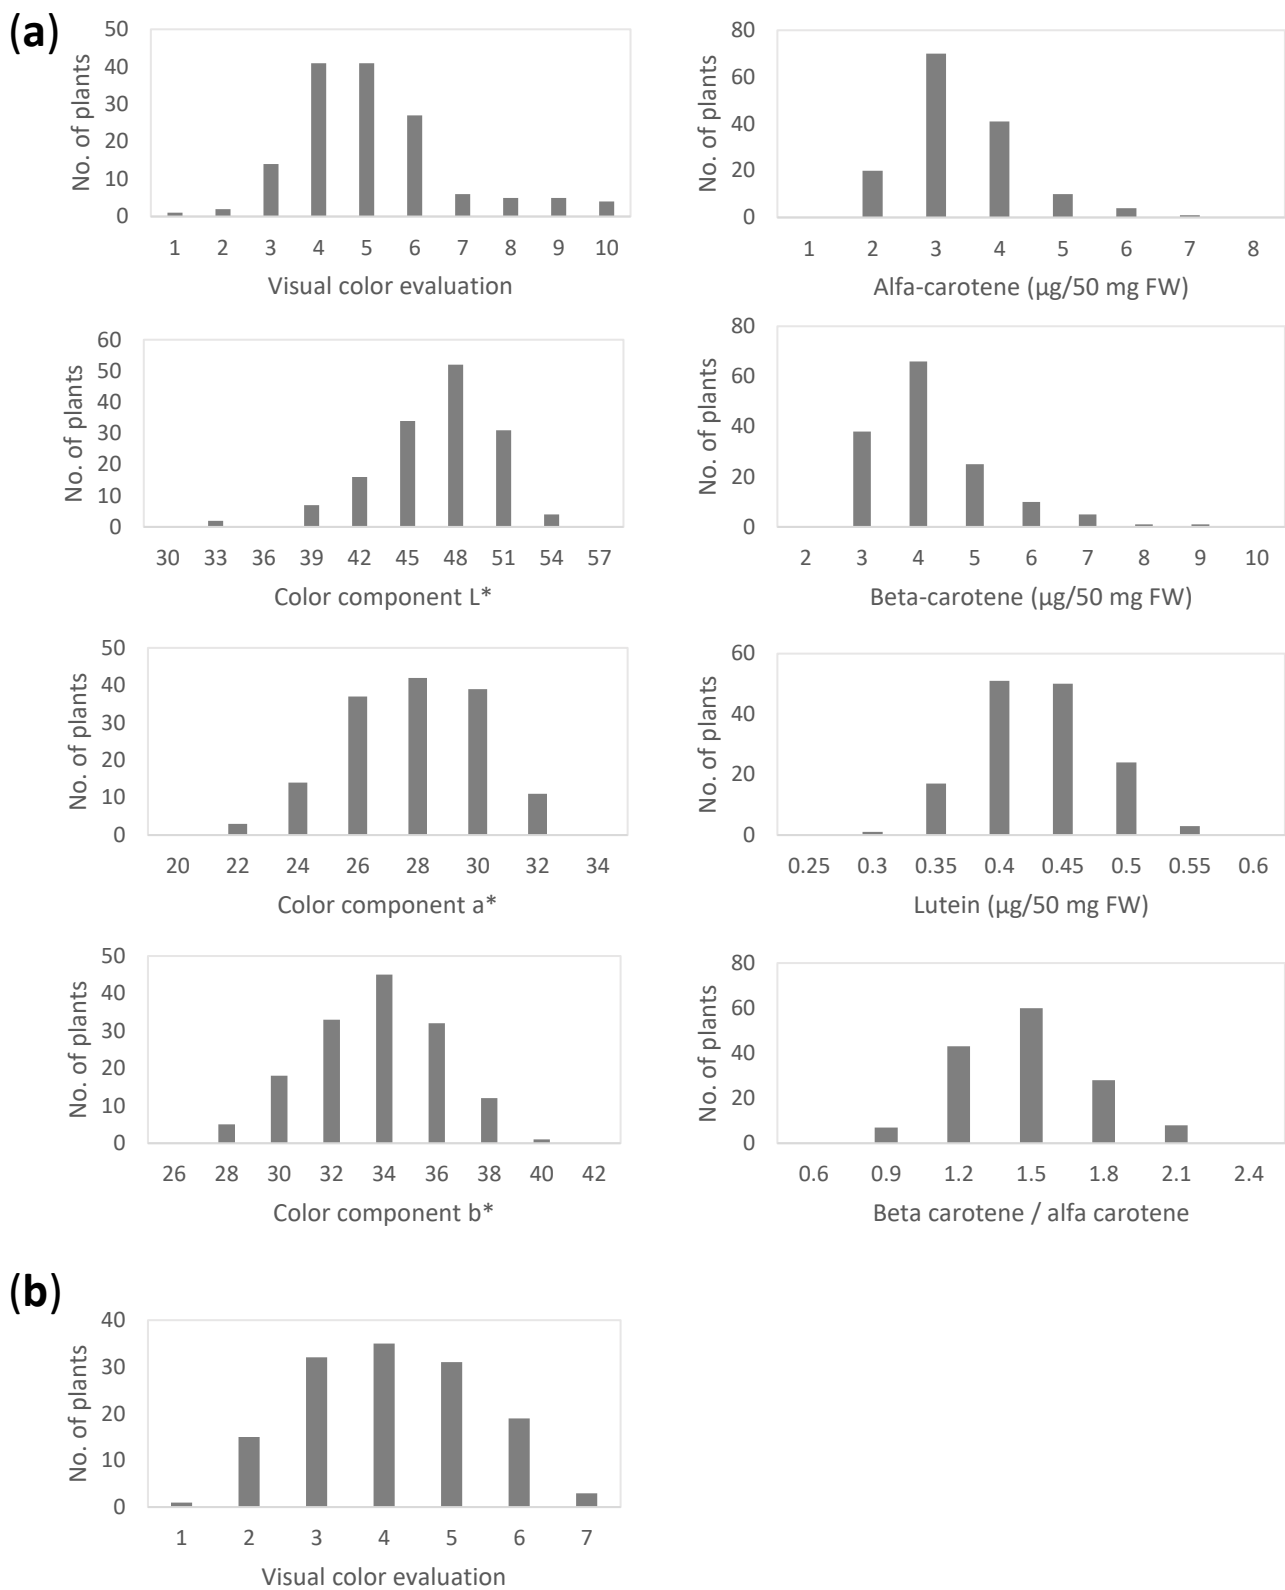

**Suppl. Fig. S1.** The frequency distributions of carrot root color in F<sub>2</sub> population A **(a)** and F<sub>2</sub> population B **(b)**. In F<sub>2</sub> population A, roots were visually evaluated, and color components (L\*, a\*, and b\*) and α- and β-carotene contents were examined (a). In F<sub>2</sub> population B, roots were only visually evaluated (b). In the visual color evaluation, root color was categorized in ten grades (1: light orange to 10: dark orange) in F<sub>2</sub> population A (a) and seven grades (1: light to 7: dark orange) in F<sub>2</sub> population B (b).

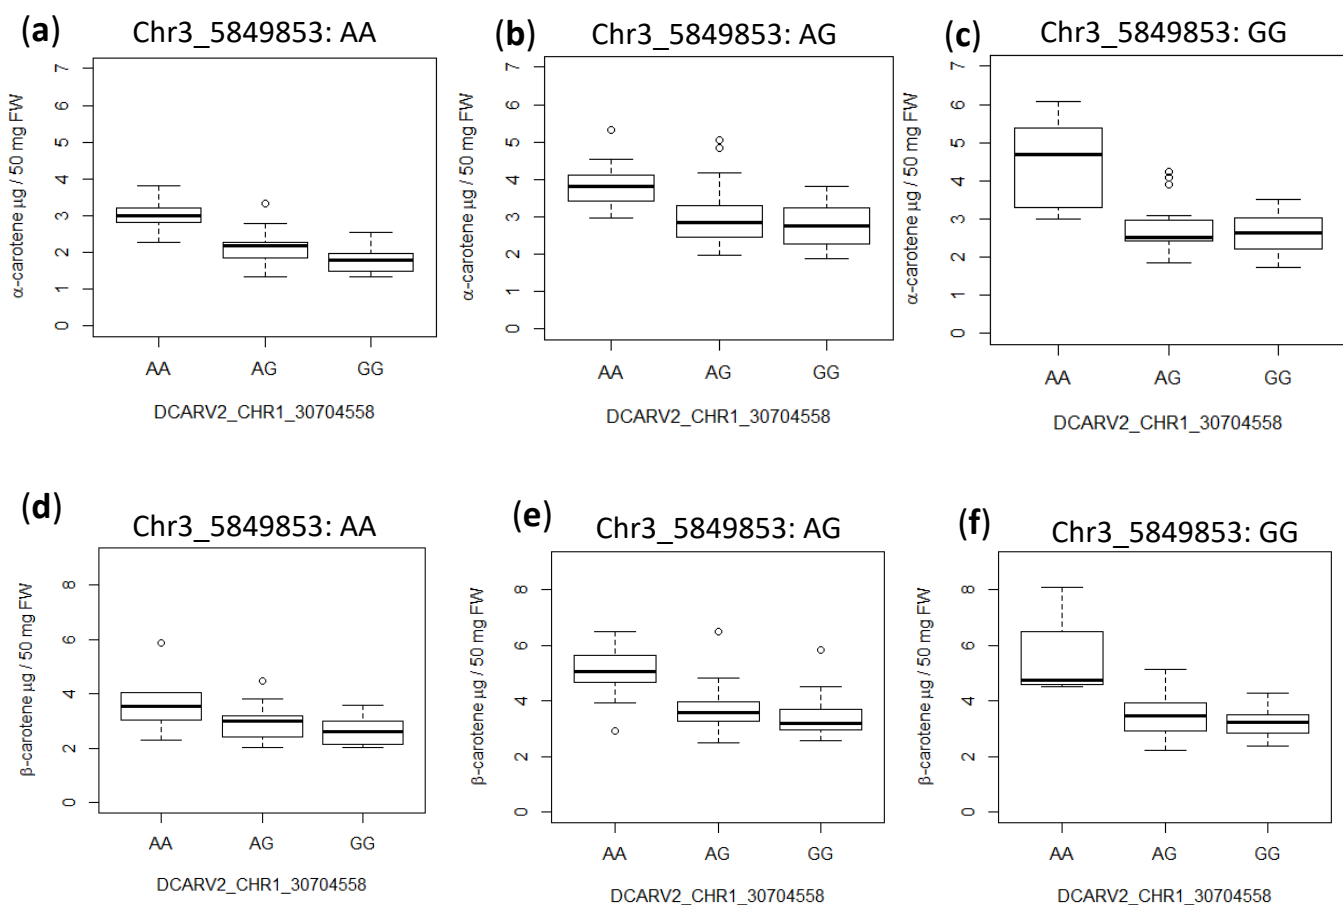

**Suppl. Fig. S2.** Examination of allelic interactions between associations detected by GWAS on chromosomes 1 and 3 for the  $\alpha$ -carotene (a–c) and  $\beta$ -carotene (d–f) content in carrot root surface. Carotene contents were box-plotted by the SNP showing the highest  $-\log_{10}P$  in the GWAS for the  $\alpha$ -carotene content on the chromosomes 1 and 3. The SNPs of chromosome 3 at physical position 5,849,853 were AA (a, d), AG (b, e), and GG (c, f).
